# Supplementary material for: A study on inorganic phase-change resist Ge2Sb2(1−x)Bi2xTe5and its mechanism
Source: Royal Society of Chemistry journal article supplement (doi:10.1039/c4cp03315a), 2014-09-09
Supplement: c4cp03315a1.pdf [file c4cp03315a1.pdf]

## Electronic Supporting Information

### Study on inorganic phase-change resist $\text{Ge}_2\text{Sb}_{2(1-x)}\text{Bi}_{2x}\text{Te}_5$ and its mechanism

Jianzheng Li,<sup>a, b, c</sup> Lirong Zheng,<sup>d</sup> Hongzhu Xi,<sup>e</sup> Dingxin Liu,<sup>a</sup> Hongguang Zhang,<sup>f</sup> Ye Tian,<sup>a</sup>

Yong Xie,<sup>a</sup> Xing Zhu,<sup>\*a, b</sup> and Qian Liu <sup>\*a</sup>

<sup>a</sup> National Center for Nanoscience and Technology, Beijing 100190, China

<sup>b</sup> Academy for Advanced Interdisciplinary Studies and School of Physics, Peking University, Beijing 100871,

China

<sup>c</sup> University of Chinese Academy of Sciences, Beijing 100049, China

<sup>d</sup> Institute of High Energy Physics Chinese Academy of Sciences, Beijing 100049, China

<sup>e</sup> Anhui Huadong Polytechnic Institute, Wuhu 241002, China

<sup>f</sup> College of Science, Nanjing University of Posts and Telecommunications, Nanjing 210023, China

\*Corresponding authors. E-mails: [liuq@nanoctr.cn](mailto:liuq@nanoctr.cn); [zhuxing@pku.edu.cn](mailto:zhuxing@pku.edu.cn)

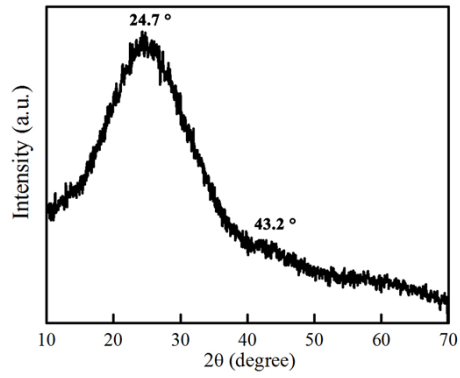

Fig. S1 The XRD pattern of the glass substrate.

Table S1. Lattice parameters of c-GST, c-Ge<sub>2</sub>Sb<sub>2(1-x)</sub>Bi<sub>2x</sub>Te<sub>5</sub> (x= 0.1, 0.25, 0.35) and c-GBT

|        | Lattice parameters (Å)              |                         |
|--------|-------------------------------------|-------------------------|
|        | Experimental Value                  | Value from Vegard's law |
| c-GST  | a= 6.0119<br>a= 6.0117 <sup>1</sup> | ---                     |
| x=0.1  | a= 6.0270                           | a=6.022                 |
| x=0.25 | a= 6.0330                           | a= 6.034                |
| x=0.35 | a=6.0480                            | a=6.046                 |
| c-GBT  | a=6.1109 <sup>2</sup>               | ---                     |

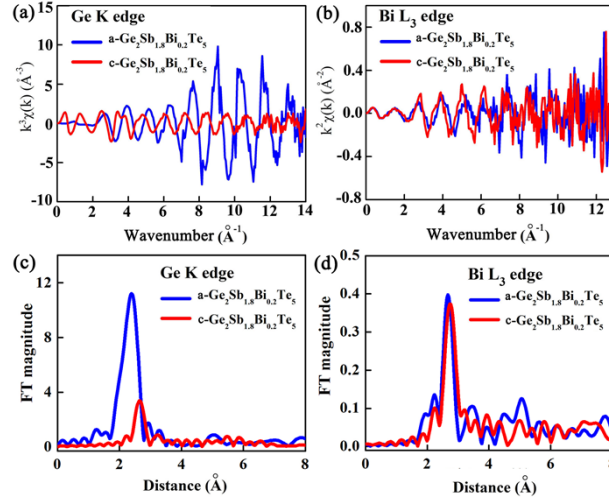

Fig. S2. (a) Ge K edge  $k^3$ -Weighted and (b) Bi  $L_3$  edge  $k^2$ -Weighted EXAFS spectra of a- $\text{Ge}_2\text{Sb}_{1.8}\text{Bi}_{0.2}\text{Te}_5$  (blue curve) and c- $\text{Ge}_2\text{Sb}_{1.8}\text{Bi}_{0.2}\text{Te}_5$  (red curve) in  $k$  space. The corresponding Fourier-transforms in  $r$  space measured (c) at Ge K edge, (d) at Bi  $L_3$  edge, the peak positions shifted towards lower  $r$  for the photoelectron phase shift of the EXAFS oscillations.

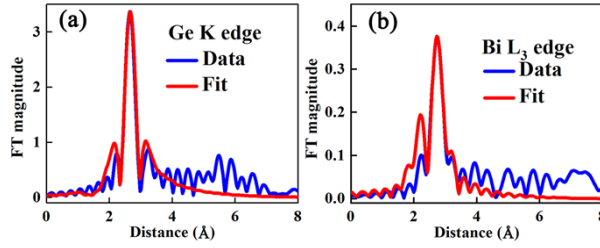

Fig. S3 The corresponding Fourier transforms (blue curves) and the fitting results (red curves) of the EXAFS spectra of c- $\text{Ge}_2\text{Sb}_{1.8}\text{Bi}_{0.2}\text{Te}_5$  at (a) Ge K edge and (b) Bi  $L_3$  edge in  $r$  space.

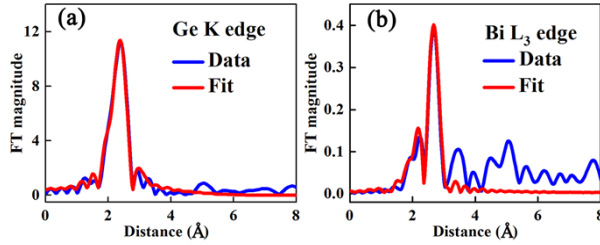

Fig. S4 The corresponding Fourier transforms (blue curves) and the fitting results (red curves) of the EXAFS spectra of a- $\text{Ge}_2\text{Sb}_{1.8}\text{Bi}_{0.2}\text{Te}_5$  at (a) Ge K edge and (b) Bi  $L_3$  edge in  $r$  space.

The XAFS energies at Ge K edge and Bi  $L_3$  edge, which are 11103 eV and 13419 eV respectively, are located in the signal-best range of the X-ray energy (4~25 KeV) of Beamline 1w1b at Beijing Synchrotron Radiation Facility (BSRF), so we measured the XAFS spectra of  $\text{Ge}_2\text{Sb}_{1.8}\text{Bi}_{0.2}\text{Te}_5$  at Ge K edge and Bi  $L_3$  edge. Fig. S2 shows the EXAFS spectra of Ge and Bi in  $k$  space and the corresponding Fourier-transforms in  $r$  space. The fits of these experimental spectra were performed by using the EXAFS equation which is expressed as follows,

$$\chi(k) = \sum_i \frac{N_i S_0^2(k) F_i(k)}{k R_i^2} \exp[-2k^2 \sigma_i^2] e^{-2R_i/\lambda_i(k)} \sin(2kR_i + \phi_i(k) - \frac{4}{3} C_{3i} k^3).$$

Here,  $i$  stands for the scattering path with degeneracy of  $N_i$ , and  $R_i$  represents the half-path distance.  $F_i(k)$  is the

scattering amplitude and  $S_0^2$  is the amplitude reduction factor.  $\sigma_i^2$  is the squared Debye-Waller factor, which is temperature-dependent and also has effects owing to structural disorder.  $\lambda_i(k)$  is the energy-dependent mean free path of XAFS, and  $\phi_i$  and  $C_{3i}$  in the term of  $\sin(2kR_i + \phi_i(k) - \frac{4}{3}C_3k^3)$  are the phase shift of the final state and the third-order accumulation, respectively. The Fourier transforms and the fitting curves of the EXAFS spectra of c- $\text{Ge}_2\text{Sb}_{1.8}\text{Bi}_{0.2}\text{Te}_5$  and a- $\text{Ge}_2\text{Sb}_{1.8}\text{Bi}_{0.2}\text{Te}_5$  in r space are shown in Fig.S3 and Fig.S4, respectively. The fitting results are shown in Table S2 below.

Table S2 Fitting results of Ge K edge and Bi L<sub>3</sub> edge EXAFS in c- $\text{Ge}_2\text{Sb}_{1.8}\text{Bi}_{0.2}\text{Te}_5$  and a- $\text{Ge}_2\text{Sb}_{1.8}\text{Bi}_{0.2}\text{Te}_5$

| Sample      | Central atom | Chemical Bond | CN <sup>a</sup> | Bond length (Å)              | $\sigma^2$ (Å <sup>2</sup> ) | R-factor |
|-------------|--------------|---------------|-----------------|------------------------------|------------------------------|----------|
| Crystalline | Ge           | Ge-Te         | $6.1 \pm 0.3$   | <sup>s</sup> $2.86 \pm 0.03$ | 0.0145                       | 0.0053   |
|             |              |               |                 | <sup>l</sup> $3.16 \pm 0.03$ | 0.0135                       |          |
| Crystalline | Bi           | Bi-Te         | $5.7 \pm 0.3$   | <sup>s</sup> $2.99 \pm 0.01$ | 0.0072                       | 0.0039   |
|             |              |               |                 | <sup>l</sup> $3.13 \pm 0.04$ | 0.0115                       |          |
| Amorphous   | Ge           | 50% Ge-Te     | $4.1 \pm 0.3$   | $2.61 \pm 0.01$              | 0.0032                       | 0.0079   |
|             |              | 50% Ge-Te     | $3.0 \pm 0.3$   | $3.01 \pm 0.05$              | 0.0090                       |          |
| Amorphous   | Bi           | Bi-Te         | $2.7 \pm 0.1$   | $2.93 \pm 0.01$              | 0.0075                       | 0.0028   |

<sup>a</sup> CN, coordination number.

<sup>s</sup> and <sup>l</sup> stand for short bonds and long bonds in c- $\text{Ge}_2\text{Sb}_{1.8}\text{Bi}_{0.2}\text{Te}_5$ , respectively.

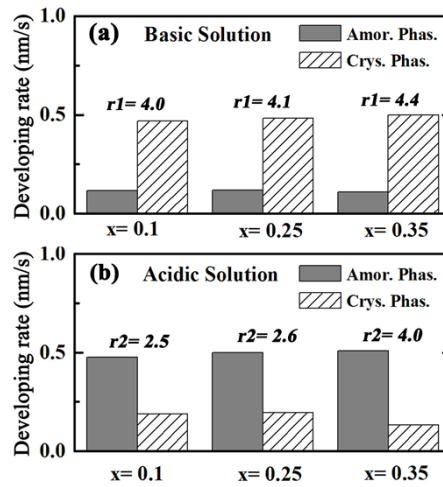

Fig. S5 (a) The ratio of developing rate ( $r1 = v_c/v_a$ ) between c-GSBT ( $x = 0.1, 0.25, 0.35$ ) and corresponding a-GSBT ( $x = 0.1, 0.25, 0.35$ ) in the basic solution ( $\text{KOH}(1\%):\text{H}_2\text{O}_2(30\%) = 20:1$ ) at 22 °C. (b) The ratio of developing rate ( $r2 = v_a/v_c$ ) between a-GSBT ( $x = 0.1, 0.25, 0.35$ ) and corresponding c-GSBT ( $x = 0.1, 0.25, 0.35$ ) in the acidic solution ( $\text{HNO}_3(65\%):\text{H}_2\text{O}:\text{H}_2\text{O}_2(30\%) = 1:6:1$ ) at 22 °C.  $v_c$  and  $v_a$  stand for the developing rate of c-GSBT and a-GSBT respectively.

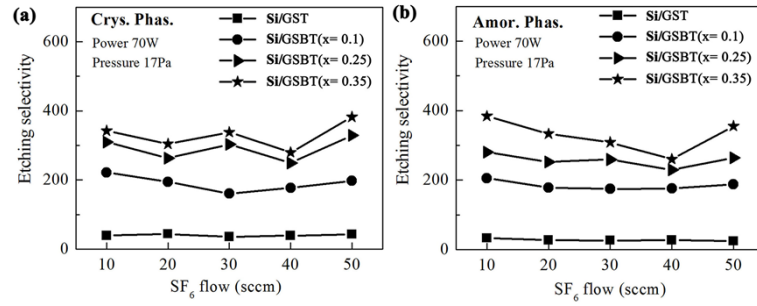

Fig. S6 (a) The etching selectivity between Si and c-GST or c-GSBT( $x=0.1, 0.25, 0.35$ ), and (b) the etching selectivity between Si and a-GST or a-GSBT ( $x=0.1, 0.25, 0.35$ ) with the etching power of 70 W, the etching pressure of 17 Pa and different flows of SF<sub>6</sub>.

## References:

1. T. Nonaka, G. Ohbayashi, Y. Toriumi, Y. Mori and H. Hashimoto, *Thin Solid Films*, 2000, **370**, 258.
2. T. Matsunaga, R. Kojima, N. Yamada, K. Kifune, Y. Kubota and M. Takata, *Acta Crystallogr., Sect. B: Struct. Sci.*, 2007, **63**, 346.
